# Supplementary material for: Novel prodrug supramolecular nanoparticles capable of rapid mitochondrial-targeting and ROS-responsiveness for pancreatic cancer therapy
Source: Royal Society of Chemistry journal article supplement (doi:10.1039/d2nj01157c), 2022-01-01

*Supporting Information for:*

**Novel Prodrug Supramolecular Nanoparticles Capable of Rapid Mitochondrial-Targeted  
and ROS-Responsive for Pancreatic Cancer Therapy**

Zheng Huang,<sup>ab</sup> Lixia Gao,<sup>a</sup> Fang Guo,<sup>a</sup> Dan Li,<sup>a</sup> Yan Tang,<sup>a</sup> Huaisong Hu,<sup>a</sup> Yafei Luo,<sup>a</sup> Dianyong Tang,<sup>a</sup>

Bochu Wang <sup>\*b</sup> and Yimei Zhang <sup>\*ab</sup>

<sup>1</sup> *National & Local Joint Engineering Research Center of Targeted and Innovative Therapeutics, Chongqing Key Laboratory of Kinase Modulators as Innovative Medicine, College of Pharmacy & International Academy of Targeted Therapeutics and Innovation, Chongqing University of Arts and Sciences, Chongqing 402160, China;*

<sup>2</sup> *Key Laboratory of Bio-theological Science and Technology of Ministry of Education, College of Bioengineering, Chongqing University, Chongqing, 400045, China*

\*Correspondence to: Yimei Zhang (E-mail: yimeizhang@cqwu.edu.cn)

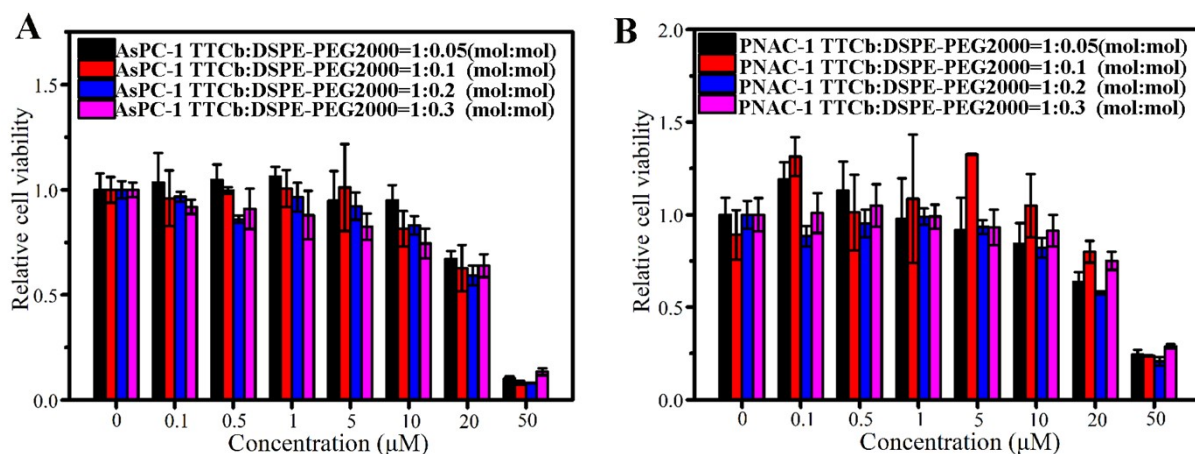

**Fig. S1** *In vitro* cytotoxicity of TTCb-NPs constructed with different molar ratios of TTCb : DSPE-PEG2000 in AsPC-1 (A) and PNAC-1 (B) cells treated with various concentrations for 48 h. Data represent mean  $\pm$  SD (n = 3).

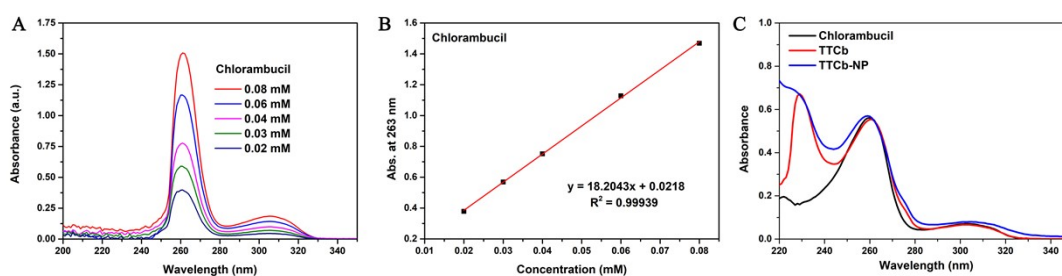

**Fig. S2** (A) UV-vis-NIR spectra of chlorambucil at different concentrations. (B) The calibration curve of chlorambucil at 263 nm. (C) UV-vis-NIR spectra of chlorambucil, TTCb, TTCb-NP.

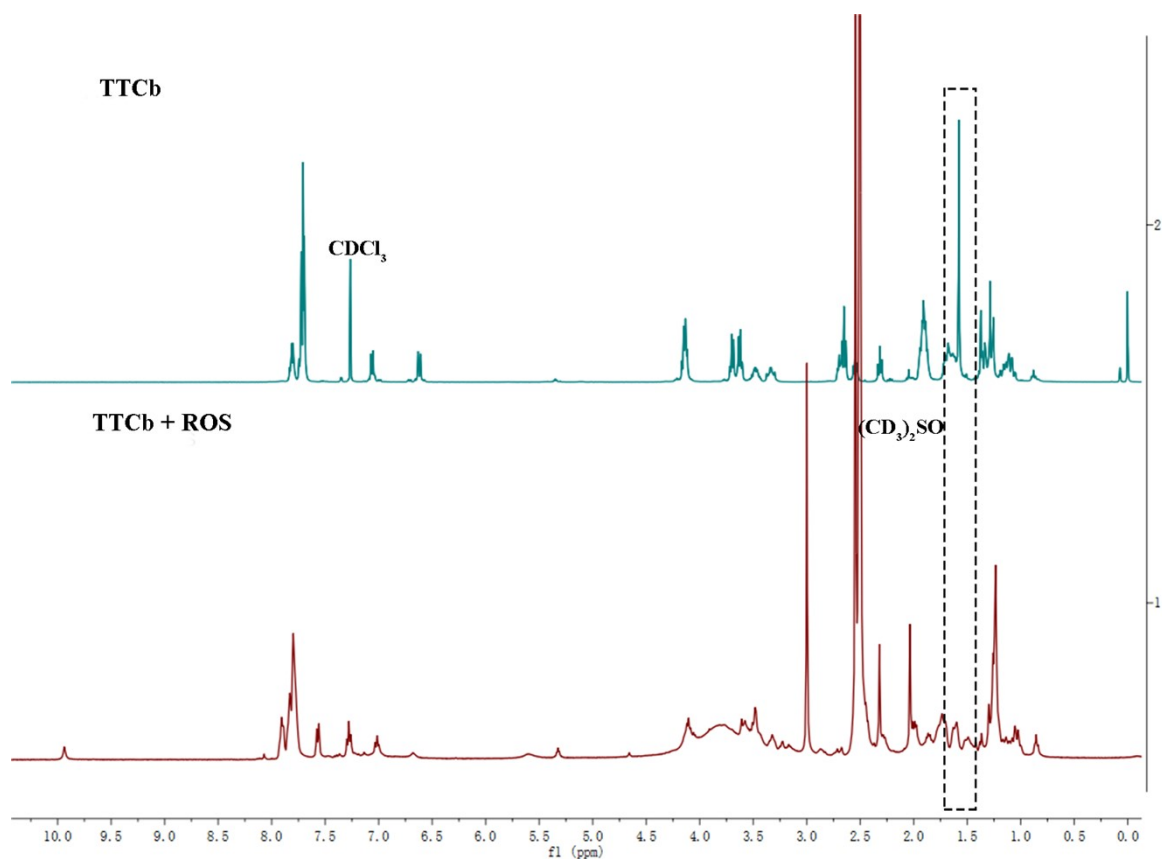

**Fig. S3** The <sup>1</sup>H NMR spectra of **TTCb** before/after treating with 200 mM H<sub>2</sub>O<sub>2</sub>.

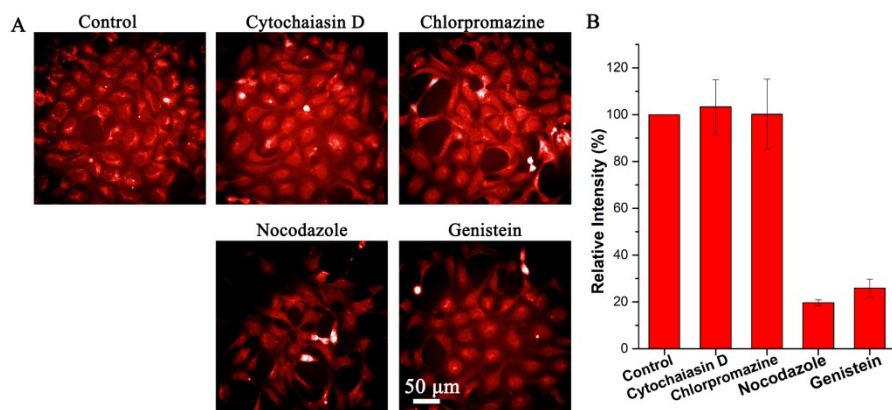

**Fig. S4** Images of the BxPC3 cells treated with **TTCb/Rho-NP** in the presence of various endocytosis inhibitors. The images were captured by high content analysis system-operetta CLSTM (A). The Relative intensity of rhodamine fluorescent in the images was calculated by the imageJ software (B).

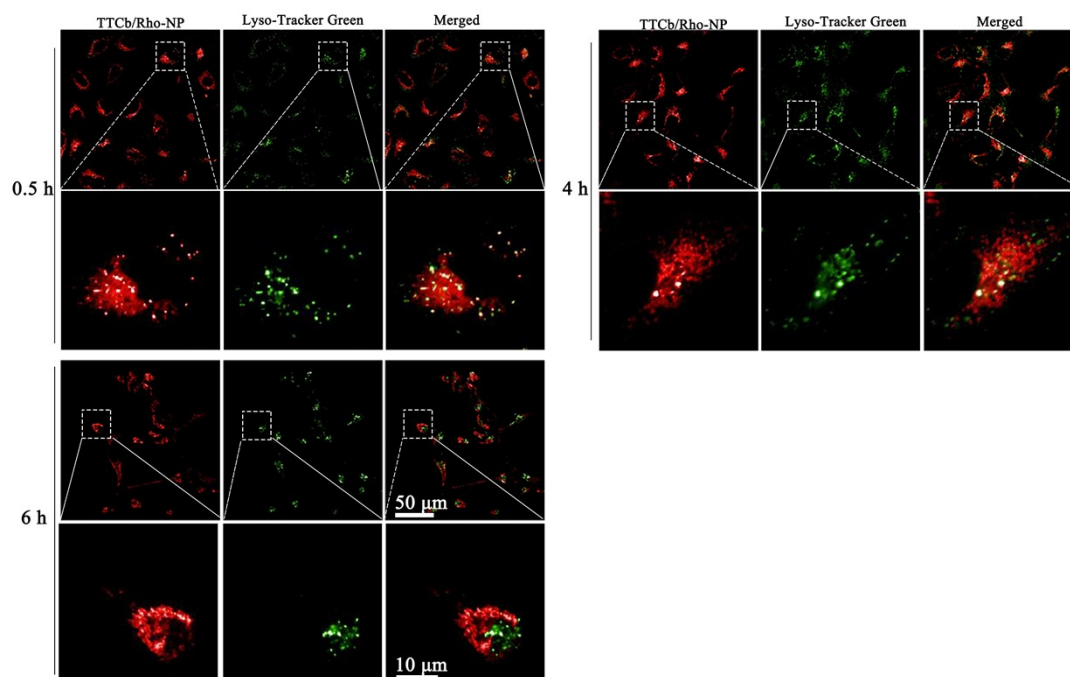

**Fig. S5** Endosomal escape behaviors of **TTCb/Rho-NPs** in vitro: Images of the BxPC3 cells treated with **TTCb/Rho-NPs** at the concentration of 10  $\mu\text{M}$  for 0.5, 4 and 6 h, captured by high content analysis system-operetta CLS<sup>TM</sup>. For each row, from left to right: **TTCb/Rho-NPs** (red, 546 nm excitations); lysosomes and acidic late endosomes stained by LysoTracker Green (green, 504 nm excitation); merged image.

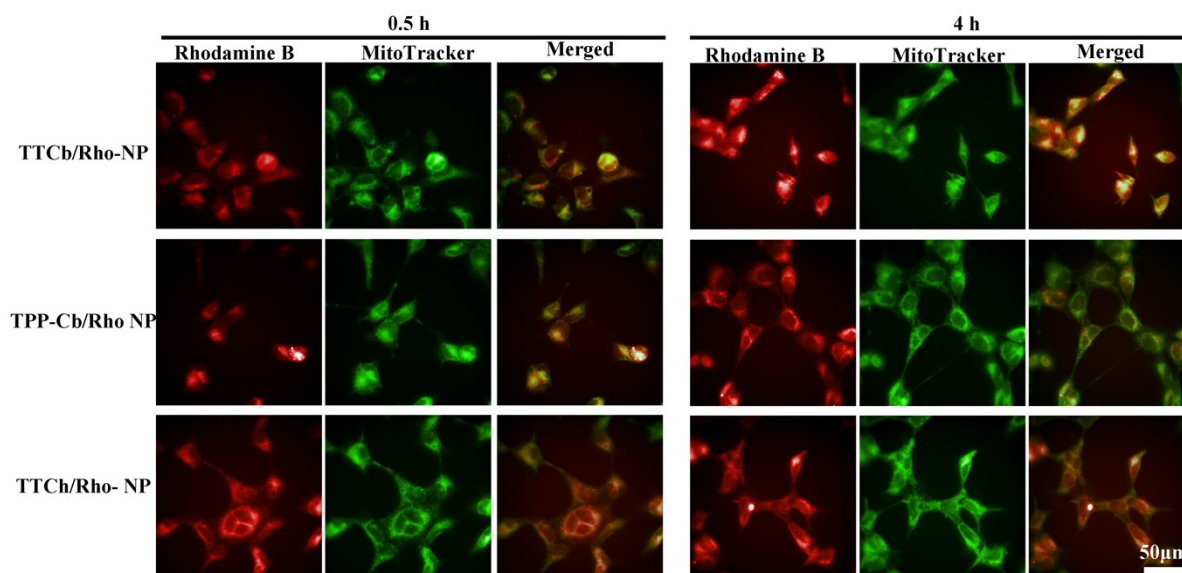

**Fig. S6** Colocalization study of **TTCb/Rho**, **TPP-Cb/Rho** and **TTCh/Rho** NPs with mitochondria. Images of the BxPC3 cells treated with different NPs at the concentration of 20  $\mu\text{M}$  for 0.5 h and 4 h captured by high content analysis system-operetta CLS<sup>TM</sup>. For each row, from left to right: Rhodamine B (546 nm excitations); mitochondria stained by MitoTracker Green (488 nm excitation); merged image. Scale bars: 50

$\mu\text{m}$ .

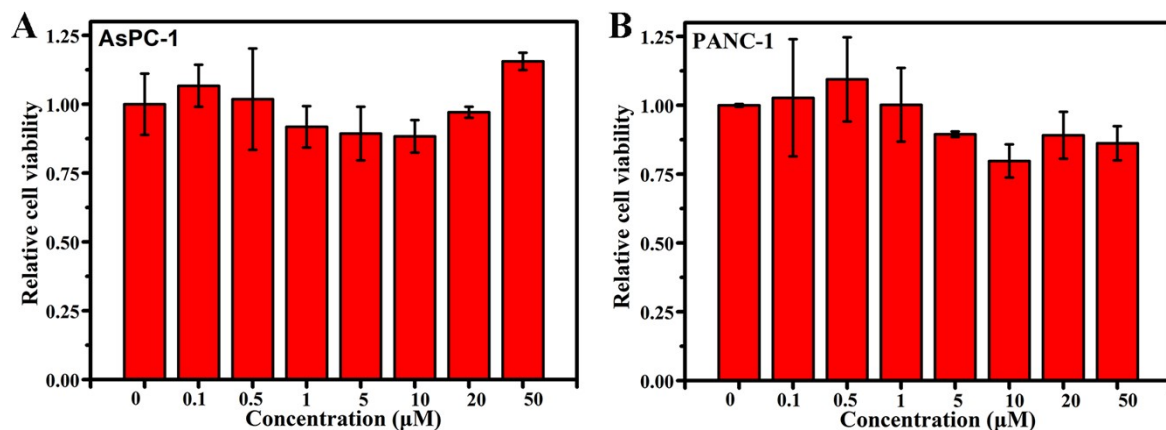

**Fig. S7** Cell viability of AsPC-1 (A) and PANC-1 (B) cells after being treated with different concentration of TTCh-NPs for 48 h. Data represent mean  $\pm$  SD (n = 3).

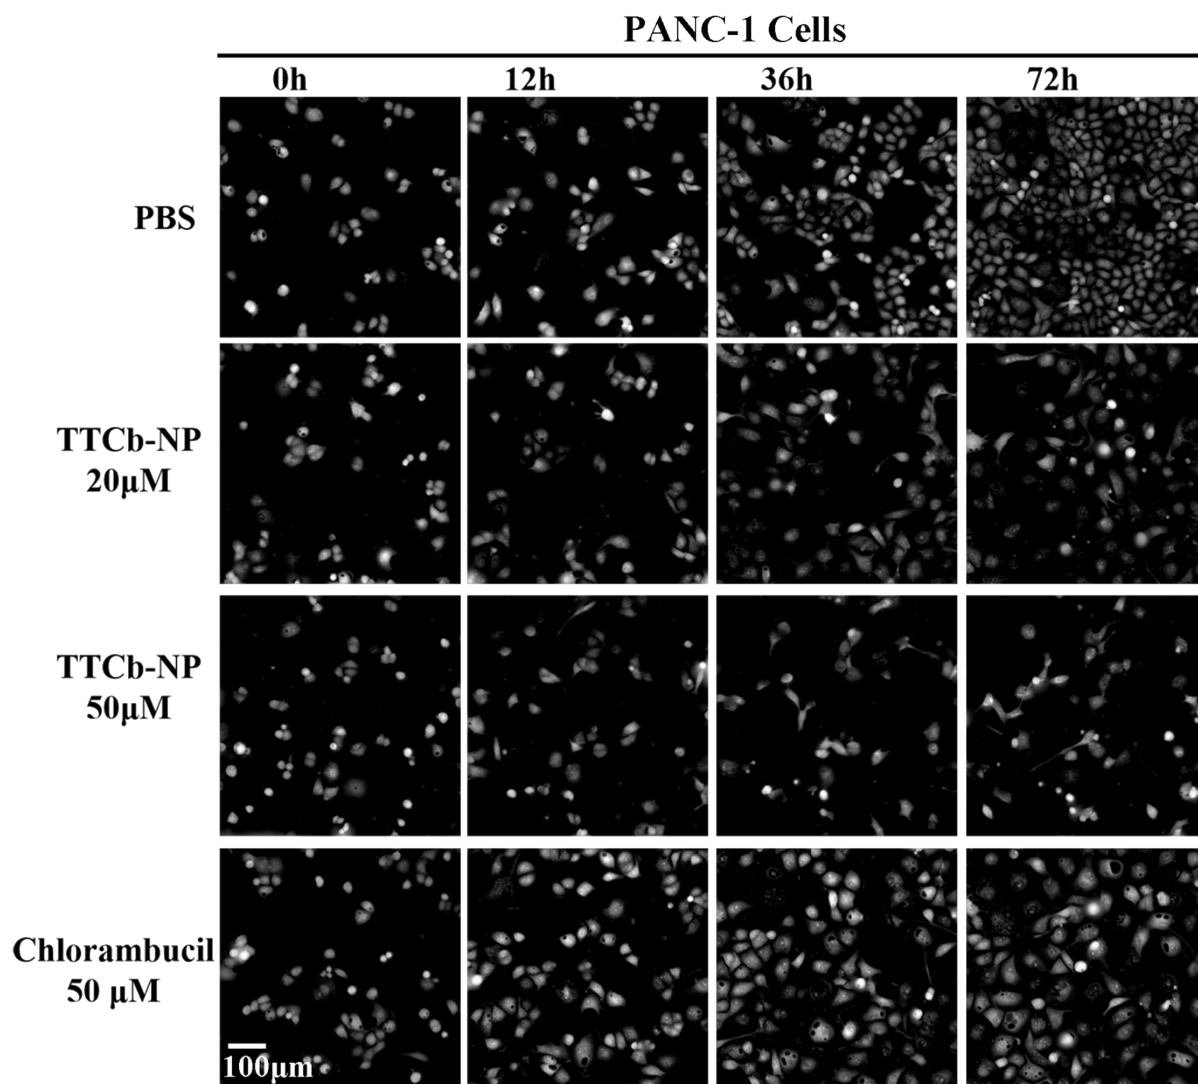

**Fig. S8** Digital phase contrast images of PANC-1 cells at different times after different treatment. Digital phase contrast images were captured by high content analysis system-operetta CLS<sup>TM</sup>. Scale bar: 100  $\mu\text{m}$ .

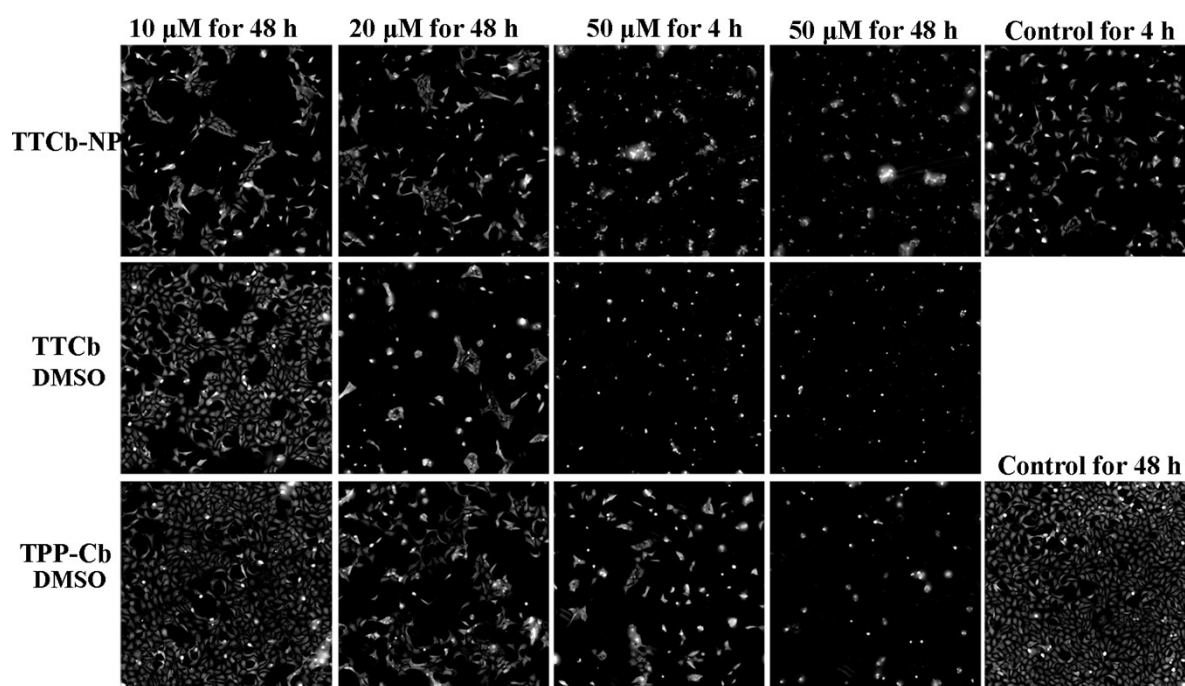

**Fig. S9** Digital phase contrast images of BxPC3 cells treated with **TTCb-NPs**, **TTCb** (dissolved in DMSO) and **TPP-Cb** (dissolved in DMSO) at various concentrations after 4 h or 48 h were captured by high content analysis system-operetta CLS™.

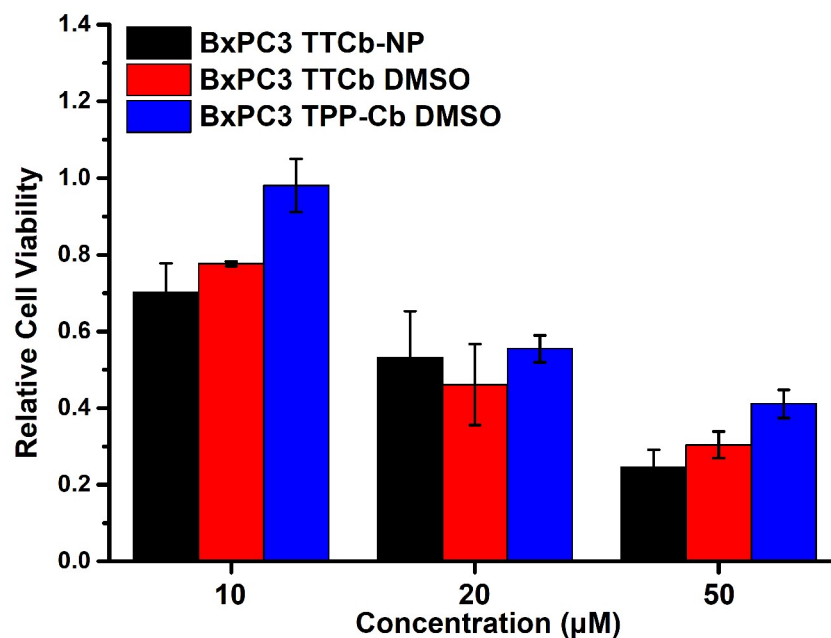

**Fig. S10** *In vitro* cytotoxicity of **TTCb-NPs**, **TTCb** (dissolved in DMSO) and **TPP-Cb** (dissolved in DMSO) at various concentrations against BxPC3 cells after 48 h incubation.

Copies of all  $^1\text{H}$  and  $^{13}\text{C}$  NMR spectra.

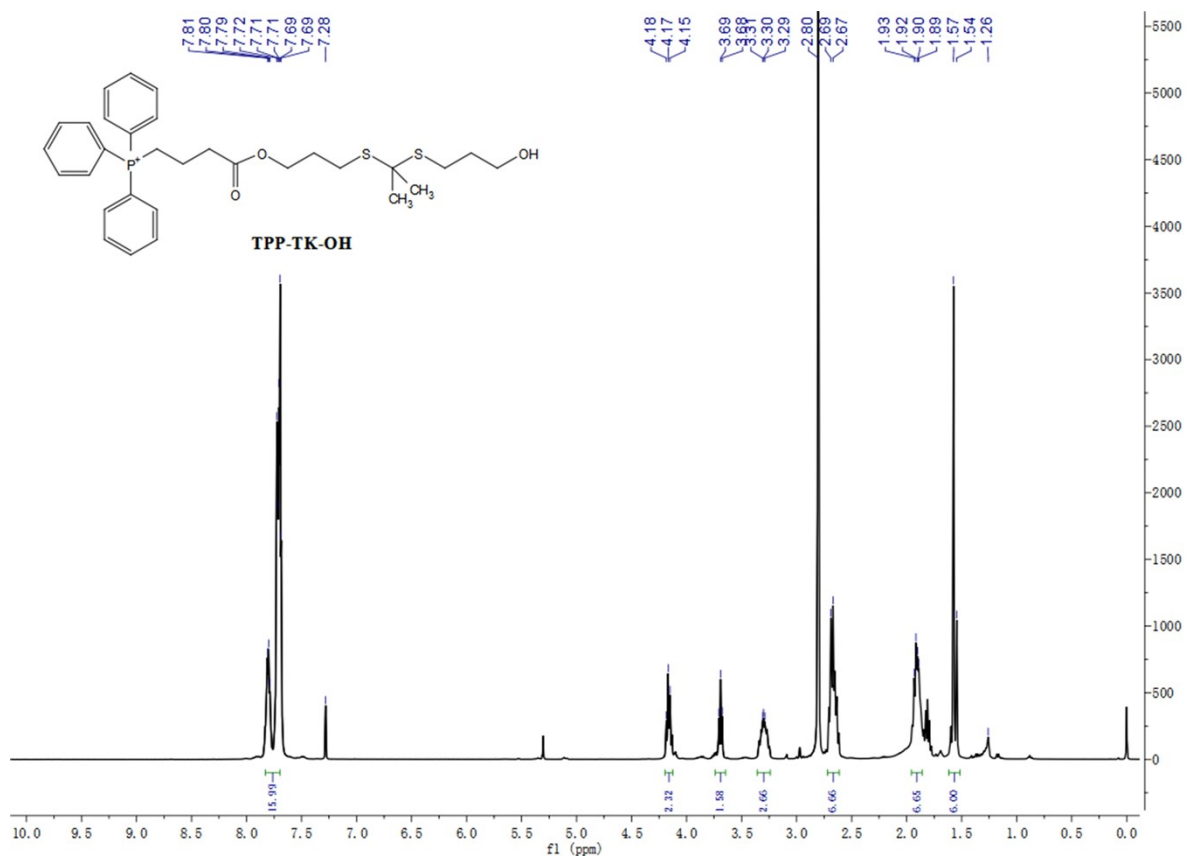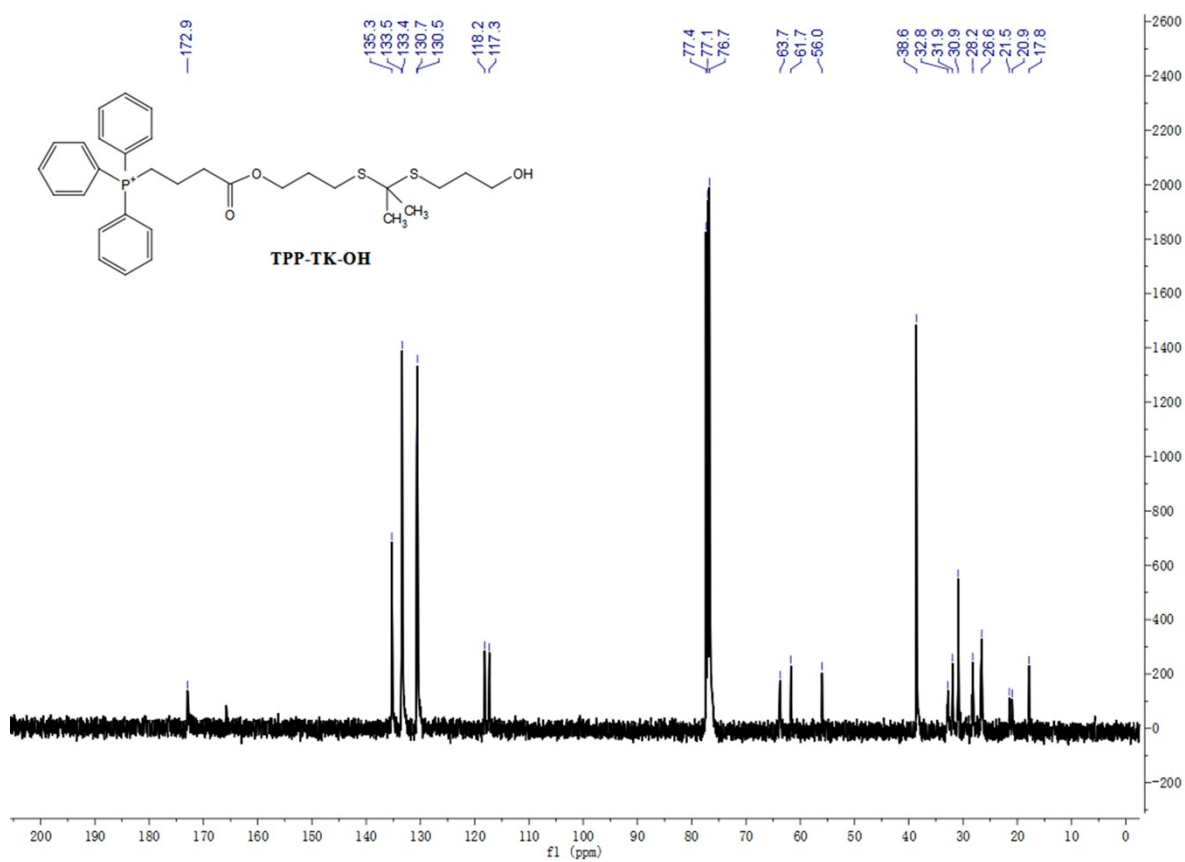

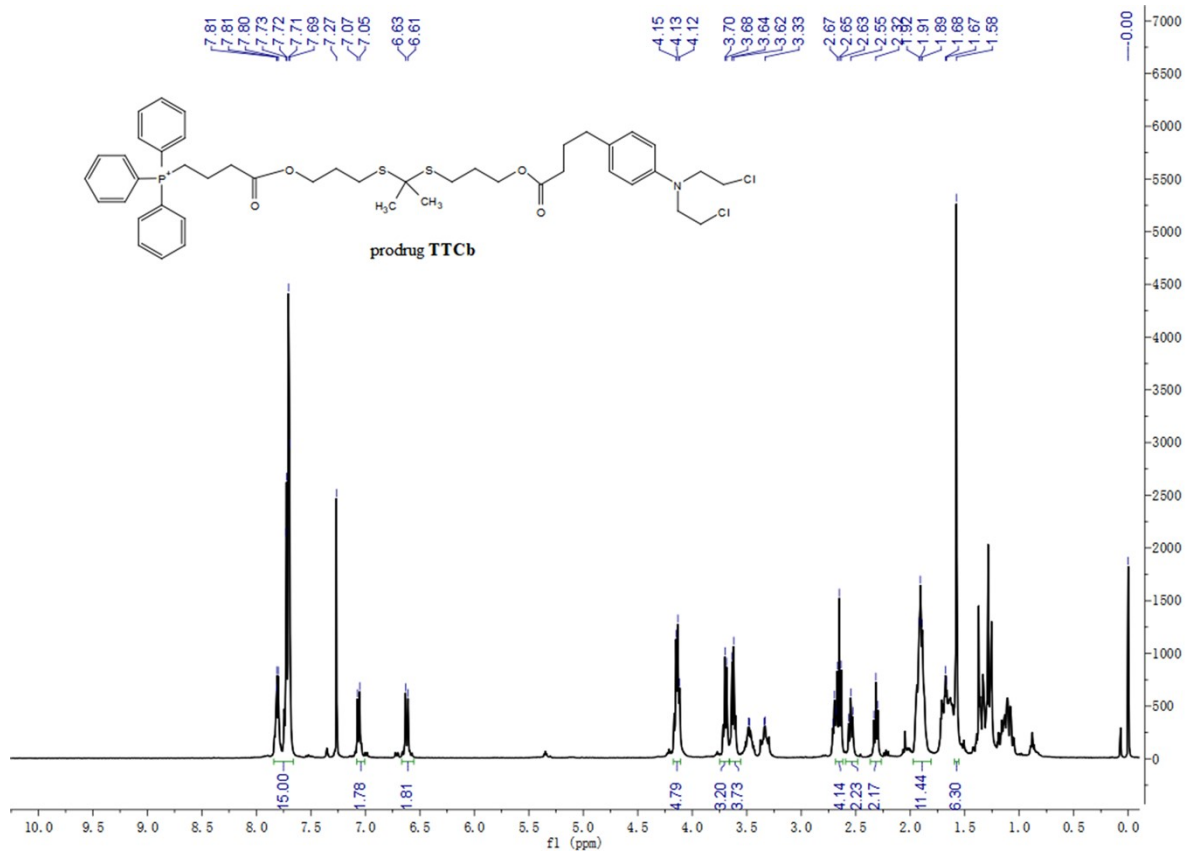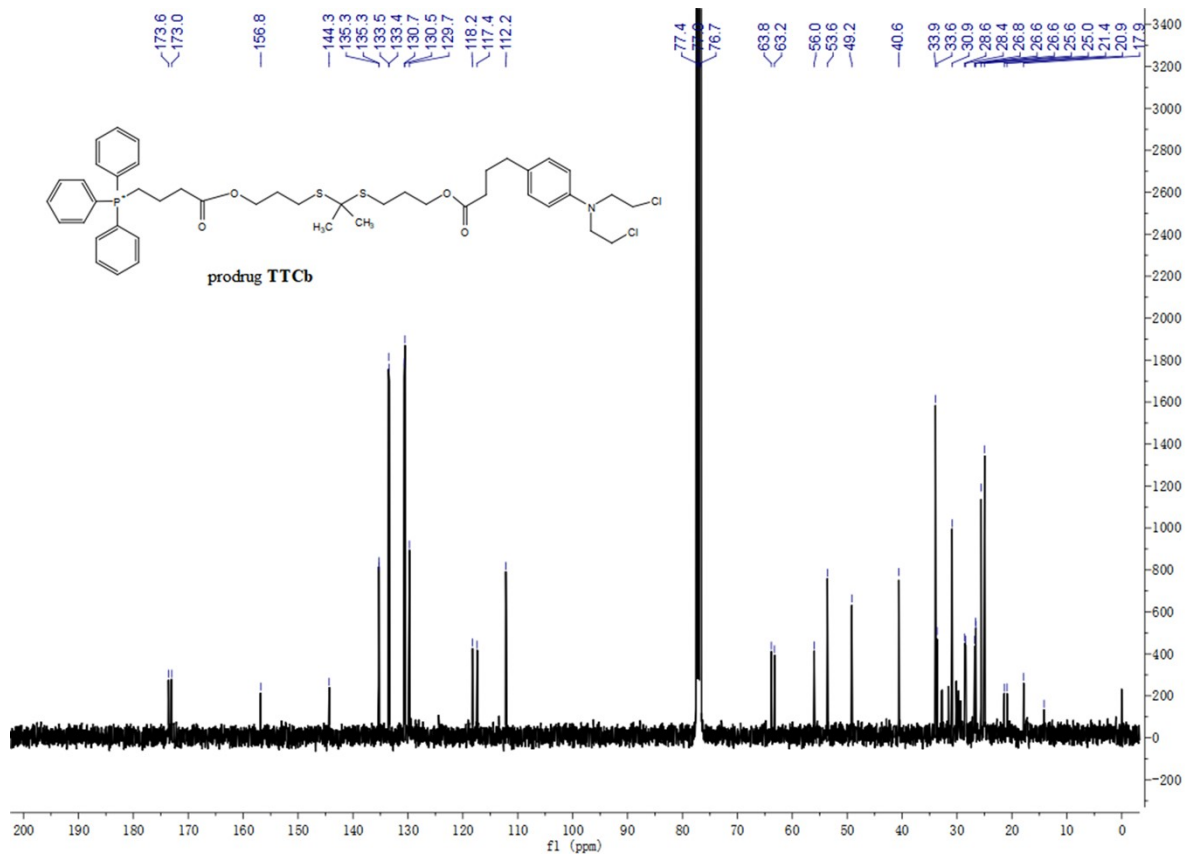



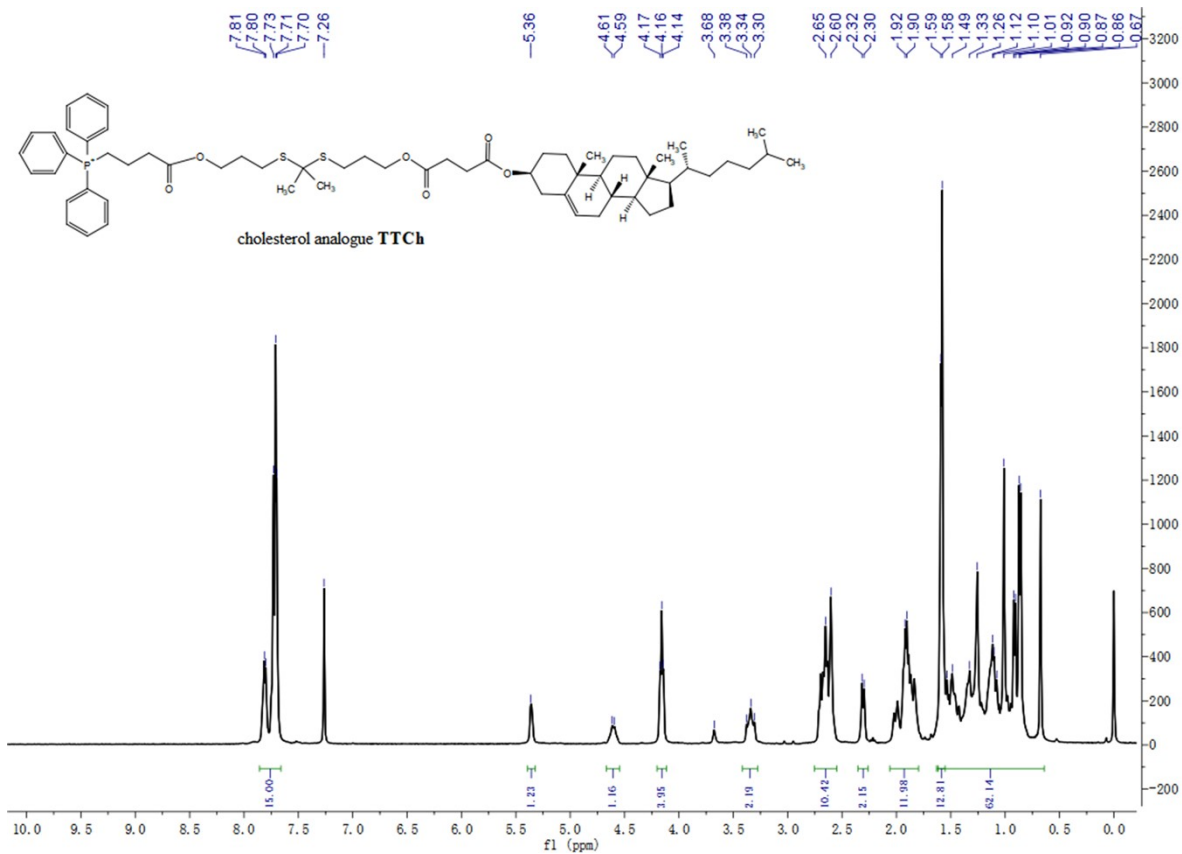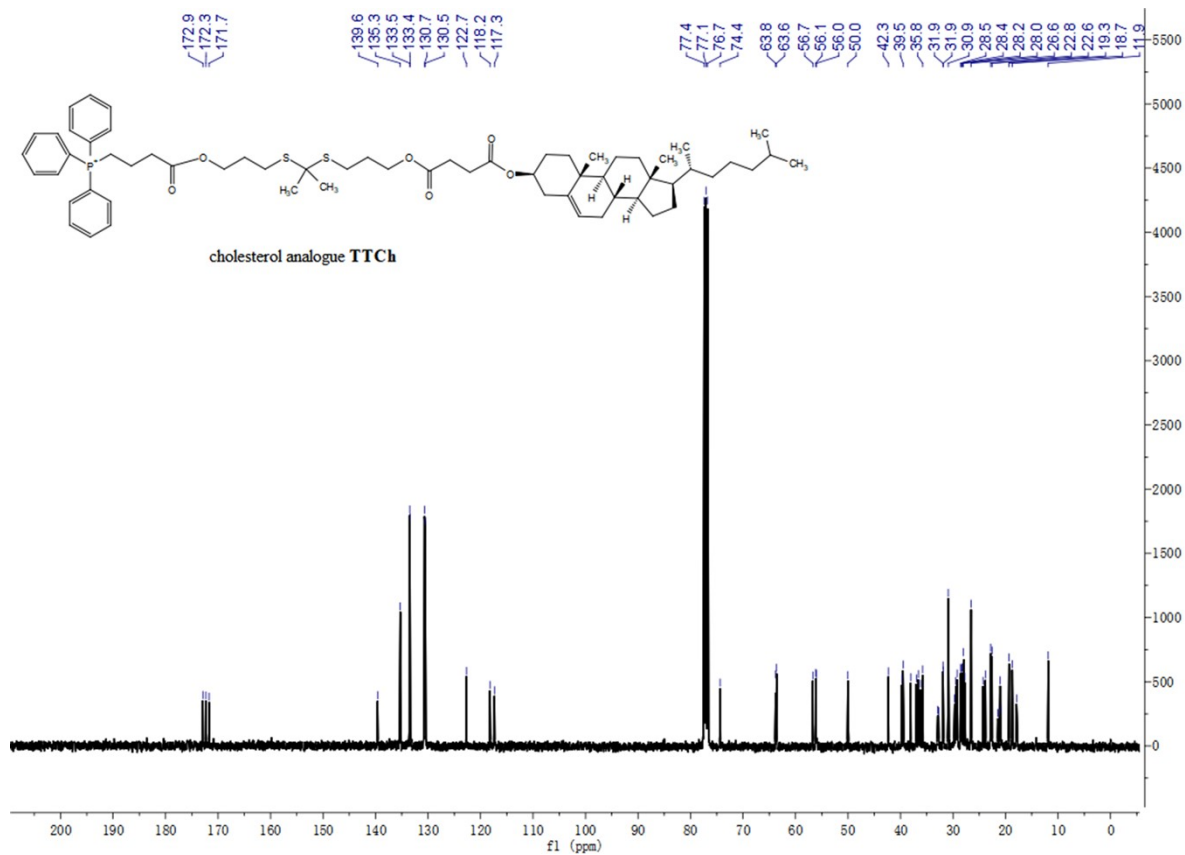

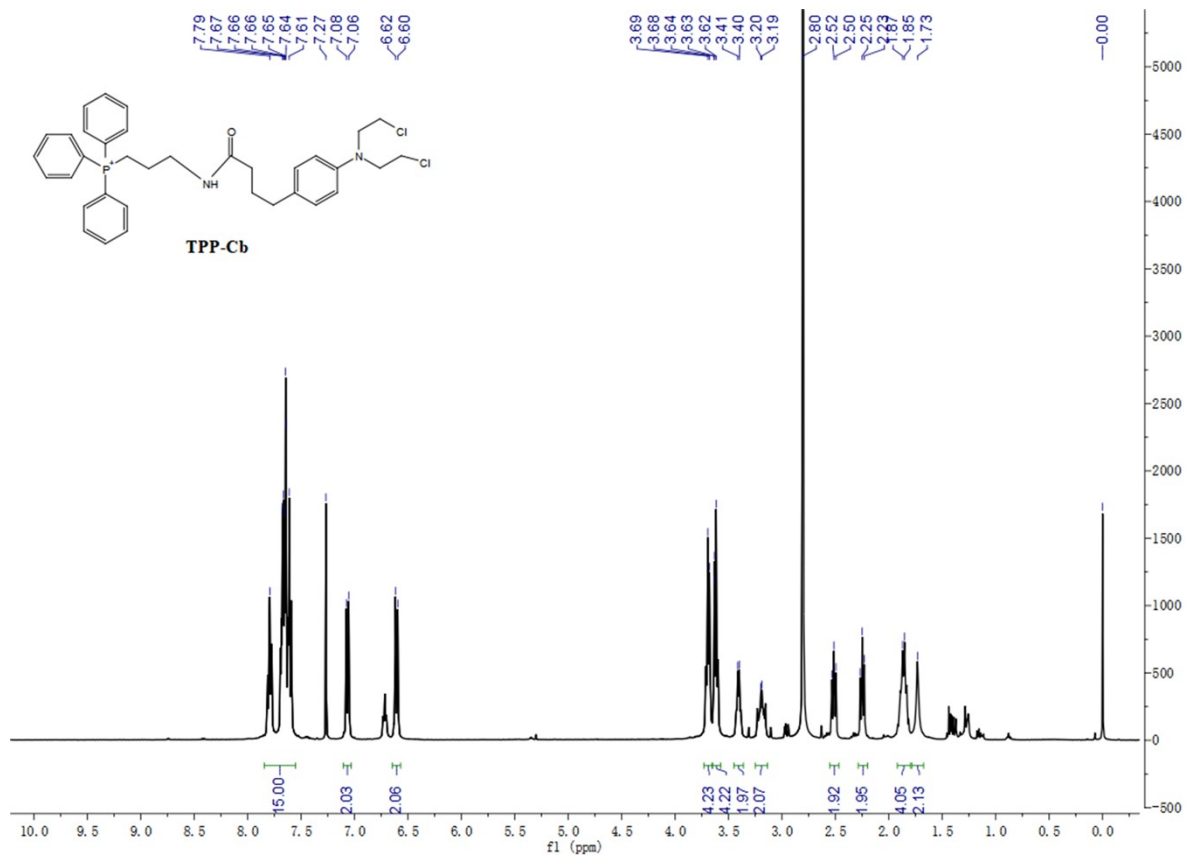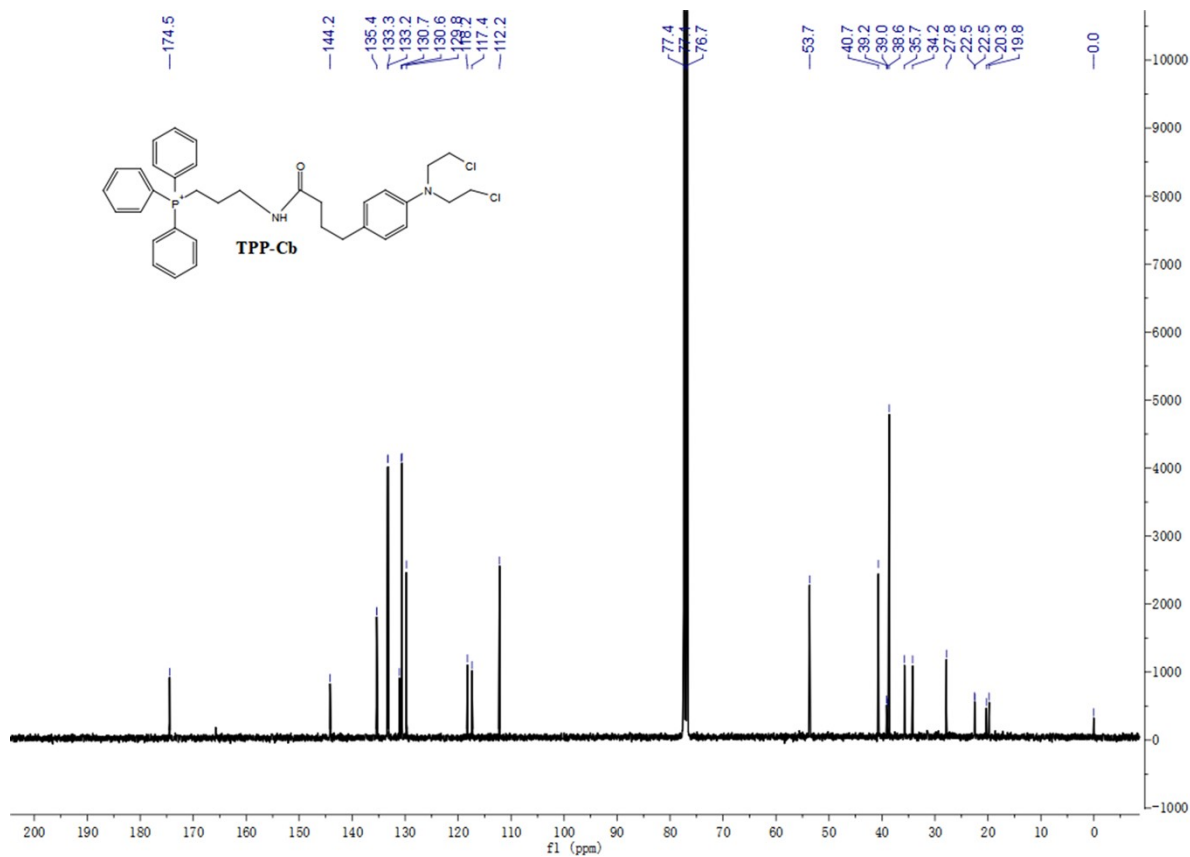

Supplement: d2nj01157c1.pdf [file d2nj01157c1.pdf]
